# Supplementary material for: Facile synthesis of dual-emission fluorescent carbon nanodots for a multifunctional probe
Source: Royal Society of Chemistry journal article supplement (doi:10.1039/d1ra07826g), 2021-01-01
Supplement: d1ra07826g1.pdf [file d1ra07826g1.pdf]

## *Supplementary Data*

### Facile synthesis of Dual-Emission Fluorescent Carbon Nanodots for a Multifunctional Probe

Chin-Wei Cheng, Kuan-Min Lo, Min-Feng Li, Tai-Chia Chiu,  
Cho-Chun Hu\*

Department of Applied Science, National Taitung University, Taiwan

|                |                                                                          |
|----------------|--------------------------------------------------------------------------|
| Chin-Wei Cheng | <a href="mailto:a98765432100011@gmail.com">a98765432100011@gmail.com</a> |
| Kuan-Min Lo    | <a href="mailto:alan112601@gmail.com">alan112601@gmail.com</a>           |
| Min-Feng Li    | <a href="mailto:a128488610@gmail.com">a128488610@gmail.com</a>           |
| Tai-Chia Chiu  | <a href="mailto:tcchiu@nttu.edu.tw">tcchiu@nttu.edu.tw</a>               |
| Cho-Chun Hu    | <a href="mailto:cchu@nttu.edu.tw">cchu@nttu.edu.tw</a>                   |

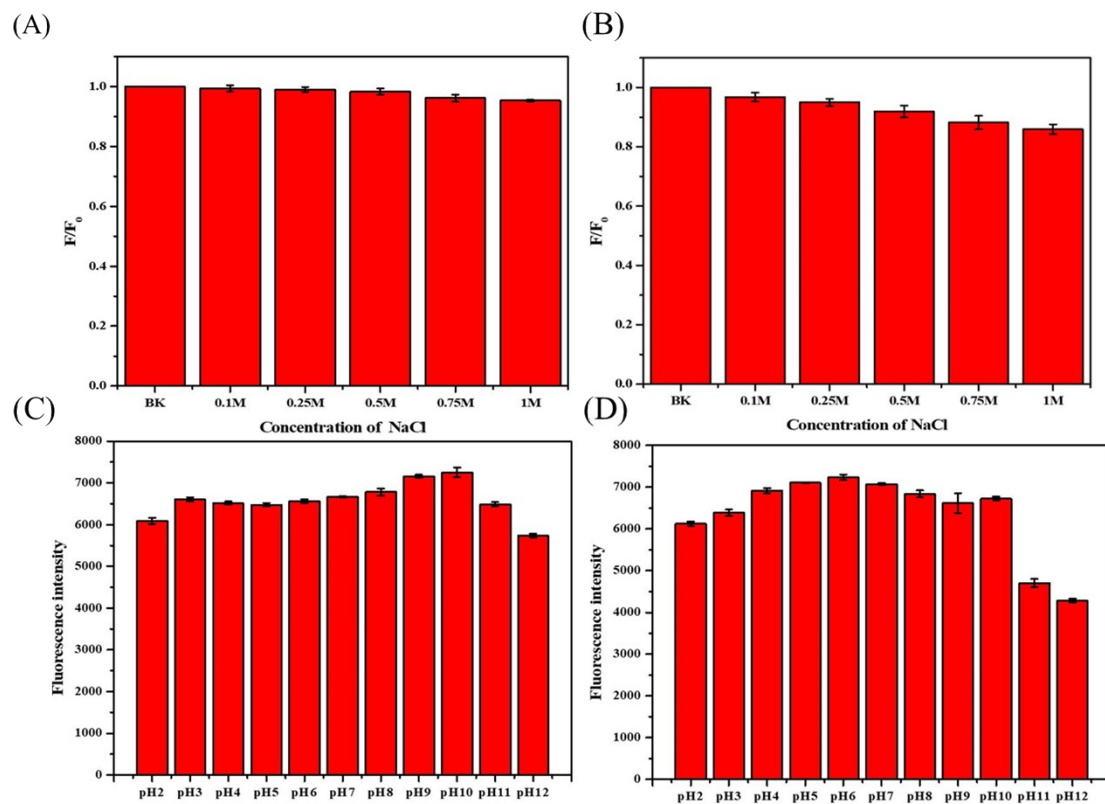

Figure S1 Effects of ionic strength at emission wavelength (A) 440 nm, (B) 510 nm, and effects of pH at emission wavelength (C) 440 nm, (D) 510 nm.

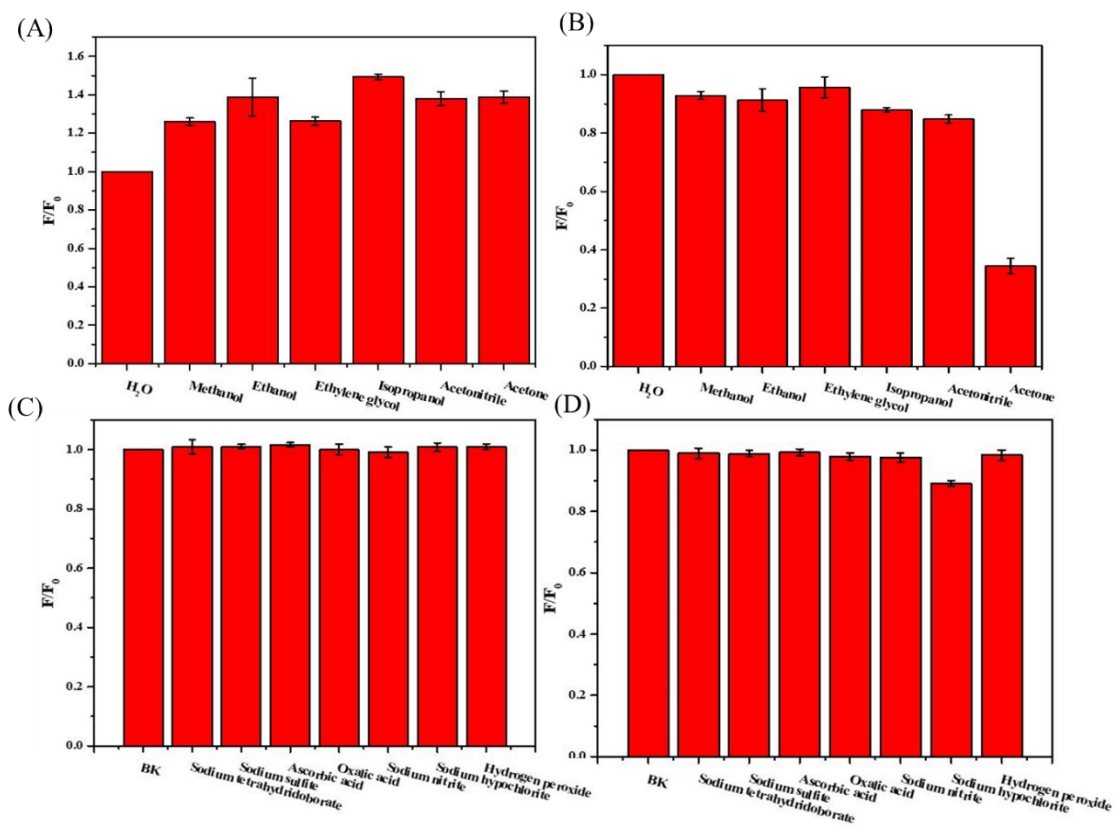

Figure S2 Effects of different solvents at emission wavelength (A) 440 nm, (B) 510 nm, and oxidizing/reducing agent at emission wavelength (C) 440 nm, (D) 510 nm.

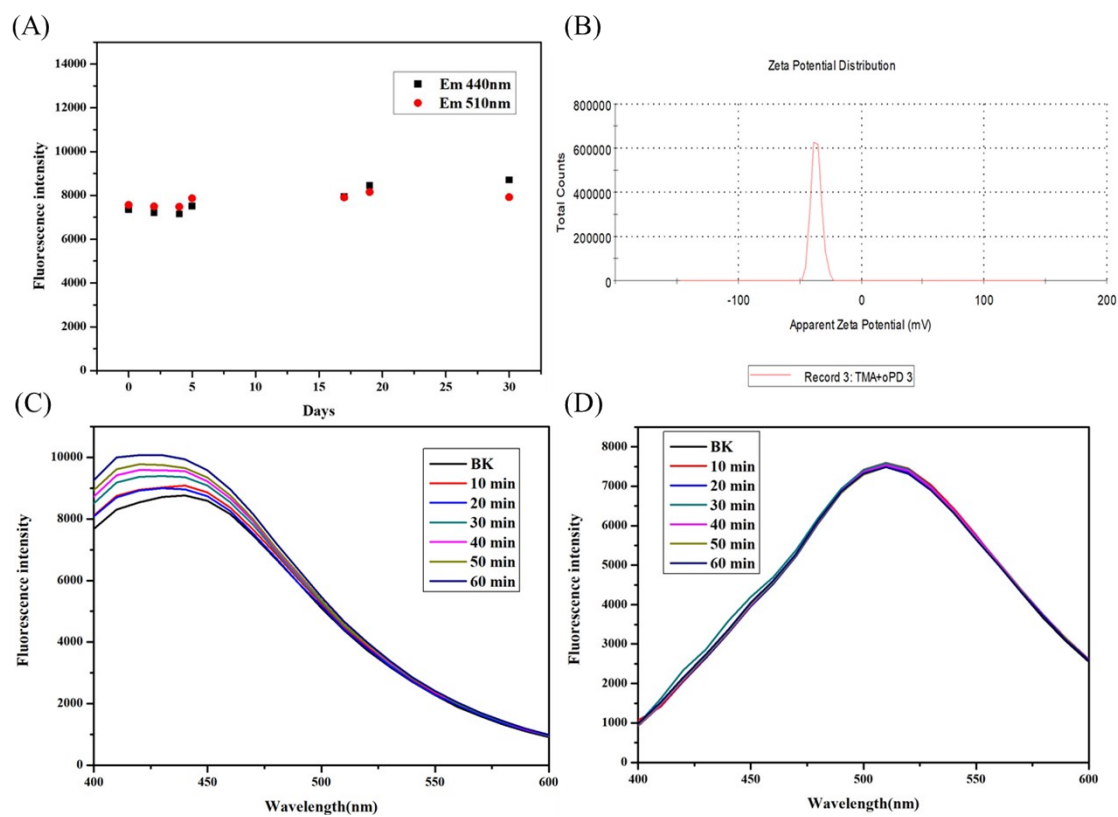

Figure S3 (A) Storage stability of CDs, and (B) Zeta potential histogram of the CDs Continuous irradiation by UV lamp with a wavelength of 254 nm on CDs at emission wavelength (C) 440 nm, (D) 510 nm.

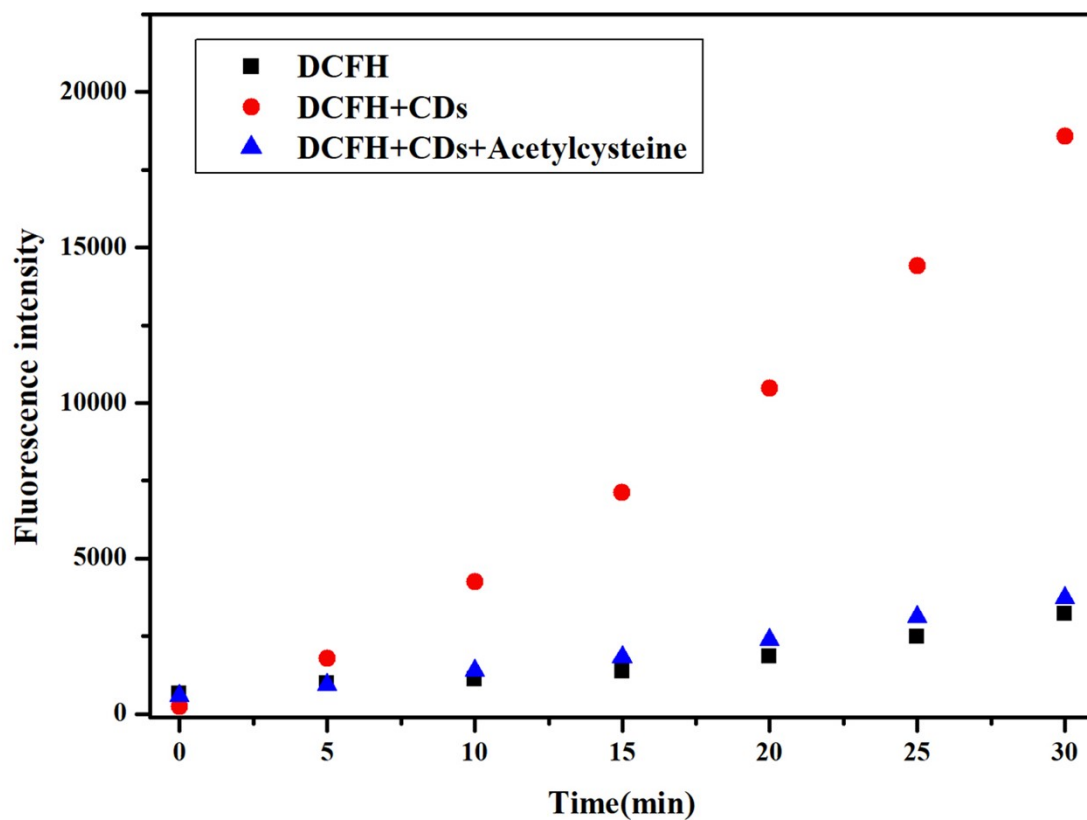

Fig. S4 Fluorescence intensity of DCHF at emission wavelength 525 nm under UV light irradiation (365 nm, 4W) in the CDs and CDs + acetylcysteine.

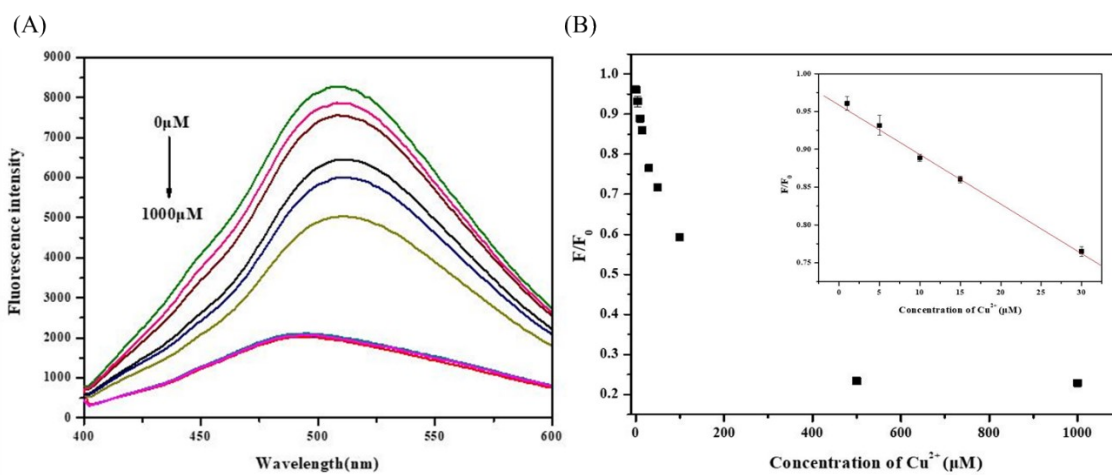

Fig. S5 (A) Dependence of fluorescence intensity of CDs on concentration of  $Cu^{2+}$ . (B) Linear plotting of  $F/F_0$  versus concentration of  $Cu^{2+}$ .

Table. S1 Optimized ratio of reactants

| <b>oPD (mmole)</b> | <b>TMA(mmole)</b> | <b>Excitation (nm)</b> | <b>Emission (nm)</b> | <b>Intensity</b> |
|--------------------|-------------------|------------------------|----------------------|------------------|
| 0.6                | 0.3               | 325                    | 440                  | 5612             |
|                    |                   | 390                    | 510                  | 5680             |
| 0.45               | 0.45              | 325                    | 440                  | 3469             |
|                    |                   | 390                    | 510                  | 5143             |
| 0.85               | 0.05              | 325                    | 440                  | 5569             |
|                    |                   | 390                    | 510                  | 7158             |
| 0.8                | 0.1               | 325                    | 440                  | 7229             |
|                    |                   | 390                    | 510                  | 7115             |
| 0.9                | 0                 | 415                    | 525                  | 6695             |

Table S2 Comparison of proposed method with the other analytical methods for Hg<sup>2+</sup> detection

| <b>Probe</b>                    | <b>Detection limit (μM)</b> | <b>Detection range (μM)</b> | <b>Ref</b> |
|---------------------------------|-----------------------------|-----------------------------|------------|
| <b>CD</b>                       | 0.09                        | 0-45                        | <u>1</u>   |
| <b>Rhodamine–glyoxylic acid</b> | 1                           | 5-200                       | <u>2</u>   |
| <b>A-NPCD</b>                   | 0.018                       | 0.03-0.20                   | <u>3</u>   |
| <b>N-SiQD</b>                   | 0.024                       | 0.1-4                       | <u>4</u>   |
| <b>N,S/C-dots</b>               | 2                           | 0-40                        | <u>5</u>   |
| <b>Carbon dots</b>              | 0.201                       | 0-80                        | <u>6</u>   |
| <b>Carbon dot nanohybrids</b>   | 0.00022                     | 0.001-1                     | <u>7</u>   |
| <b>Carbon dots</b>              | 0.1                         | 1-18                        | <u>8</u>   |
| <b>CDs mixed Rhodamine B</b>    | 0.025                       | 0.5-10                      | <u>9</u>   |
| <b>CDs</b>                      | 0.42                        | 5-50                        | This work  |



Table S3 Comparison of proposed method with the other analytical methods for glyphosate detection

| <b>Probe</b>                                  | <b>Detection limit (mg L<sup>-1</sup>)</b> | <b>Detection range (mg L<sup>-1</sup>)</b> | <b>Ref</b> |
|-----------------------------------------------|--------------------------------------------|--------------------------------------------|------------|
| <b>Carbon dot</b>                             | 0.012                                      | 0.025–2.5                                  | <u>10</u>  |
| <b>Diffuse reflectance spectroscopy</b>       | 7.28                                       | 50-500                                     | <u>11</u>  |
| <b>Hydrophilic interaction Chromatography</b> | 0.1                                        | 0.1-34                                     | <u>12</u>  |
| <b>CDs</b>                                    | 0.0006                                     | 0.002-0.02                                 | <u>13</u>  |
| <b>MWCNTs</b>                                 | 0.00067                                    | 0.002 - 0.01                               | <u>14</u>  |
| <b>IgG-CDs</b>                                | 0.008                                      | 0.01-80                                    | <u>15</u>  |
| <b>CQD-CdTe</b>                               | 0.008                                      | 0-0.03                                     | <u>16</u>  |
| <b>CDs</b>                                    | 1.1                                        | 2.5-25                                     | This work  |

## Reference

1. H. Zhang, J. You, J. Wang, X. Dong, R. Guan and D. Cao, *Dyes and Pigments*, 2020, **173**, 107950.
2. X. Zhang and Y.-Y. Zhu, *Sensors and Actuators B: Chemical*, 2014, **202**, 609-614.
3. A. K. Singh, V. K. Singh, M. Singh, P. Singh, S. R. Khadim, U. Singh, B. Koch, S. Hasan and R. Asthana, *Journal of Photochemistry and Photobiology A: Chemistry*, 2019, **376**, 63-72.
4. S. Shen, B. Huang, X. Guo and H. Wang, *Journal of Materials Chemistry B*, 2019, **7**, 7033-7041.
5. L. Li, B. Yu and T. You, *Biosensors and Bioelectronics*, 2015, **74**, 263-269.
6. J. He, H. Zhang, J. Zou, Y. Liu, J. Zhuang, Y. Xiao and B. Lei, *Biosensors and Bioelectronics*, 2016, **79**, 531-535.
7. Z. Liu, W. Jin, F. Wang, T. Li, J. Nie, W. Xiao, Q. Zhang and Y. Zhang, *Sensors and Actuators B: Chemical*, 2019, **296**, 126698.
8. V. Sharma, A. K. Saini and S. M. Mobin, *Journal of Materials Chemistry B*, 2016, **4**, 2466-2476.
9. S. Lu, D. Wu, G. Li, Z. Lv, Z. Chen, L. Chen, G. Chen, L. Xia, J. You and Y. Wu, *RSC advances*, 2016, **6**, 103169-103177.
10. L. Wang, Y. Bi, J. Gao, Y. Li, H. Ding and L. Ding, *RSC advances*, 2016, **6**, 85820-85828.
11. L. Wang, Y. Bi, J. Hou, H. Li, Y. Xu, B. Wang, H. Ding and L. Ding, *Talanta*, 2016, **160**, 268-275.
12. A. S. da Silva, F. C. B. Fernandes, J. O. Tognolli, L. Pezza and H. R. Pezza, *Spectrochimica Acta Part A: Molecular and Biomolecular Spectroscopy*, 2011, **79**, 1881-1885.
13. C. F. Coutinho, L. F. Coutinho, L. H. Mazo, S. L. Nixdorf, C. A. Camara and F. M. Lanças, *Analytica chimica acta*, 2007, **592**, 30-35.
14. Y. Yuan, J. Jiang, S. Liu, J. Yang, J. Yan and X. Hu, *Sensors and Actuators B: Chemical*, 2017, **242**, 545-553.
15. D. Wang, B. Lin, Y. Cao, M. Guo and Y. Yu, *Journal of agricultural and food chemistry*, 2016, **64**, 6042-6050.
16. M. K. Bera and S. Mohapatra, *Colloids and Surfaces A: Physicochemical and Engineering Aspects*, 2020, **596**, 124710.
